# Supplementary material for: Photobiology: introduction, overview and challenges
Source: Frontiers journal article supplement (doi:10.3389/fphbi.2023.1253330), 2023-09-20
Supplement: Table_1.pdf [file Table_1.pdf]

## *Supplementary Material*

**Supplementary Table 1.** Glossary

| <b>Terms</b>            | <b>Definition</b>                                                                                                                                                                      |
|-------------------------|----------------------------------------------------------------------------------------------------------------------------------------------------------------------------------------|
| Bioimaging              | Visualisation and analysis of biological structures and processes                                                                                                                      |
| Bioluminescence         | Form of chemiluminescence. The production and emission of light by organisms                                                                                                           |
| Circadian clock         | Internal oscillator in organisms that cycles with a stable phase and is synchronised with solar time                                                                                   |
| Ecological photobiology | Study of ecological interactions between light and organisms                                                                                                                           |
| Fluorescence            | A form of photoluminescence. Emission of light by a substance that has absorbed light or other electromagnetic radiation. It ceases immediately after the excitation source is removed |
| Light pollution         | Presence of anthropogenic artificial light in otherwise dark conditions                                                                                                                |
| Luminescence            | Spontaneous emission of radiation from an electronically excited species. When this results from the absorption of photons: Photoluminescence                                          |
| Optical imaging         | Type of bioimaging that uses light and fluorescent markers                                                                                                                             |
| Optogenetics            | Technique for controlling the activity of cells with light via light-sensitive proteins                                                                                                |
| Phosphorescence         | Form of photoluminescence: Persistent emission of light after the excitation has ceased (see fluorescence)                                                                             |
| Photobiology            | The study of the biological effects of light                                                                                                                                           |
| Photobiomodulation      | Light therapy using non-ionising forms of light sources, including lasers, LEDs and broadband light, in the visible and near-infrared spectrum                                         |
| Photochemistry          | The study of chemical reactions caused by the absorption of light                                                                                                                      |
| Photodynamic therapy    | Treatment of certain skin conditions using light and a photosensitiser                                                                                                                 |
| Photomedicine           | Interdisciplinary branch of medicine concerned with the study and use of light with in relation to health and disease                                                                  |
| Photomorphogenesis      | Response of growth patterns to light                                                                                                                                                   |
| Photomovement           | Light-induced motility of an organism or parts of it                                                                                                                                   |
| Photoreception          | Mechanism of light detection                                                                                                                                                           |
| Photosensitiser         | Photosensitizers are molecules that absorb light and transfer the energy to another nearby molecule                                                                                    |
| Photoperiodism          | Response of an organism to variations in light duration                                                                                                                                |

|                           |                                                                                                                                              |
|---------------------------|----------------------------------------------------------------------------------------------------------------------------------------------|
| Photophysics              | The physics of light, in particular of the interaction of light with matter                                                                  |
| Photosynthesis            | Conversion of light into biochemical energy to drive cellular processes                                                                      |
| Photosystem               | Multi-protein-pigment complex in which light absorption, charge separation and electron transport take place                                 |
| Quenching                 | Certain molecules (“quenchers“) can prevent the emission of light (fluorescence or phosphorescence) from other molecules in an excited state |
| Ultraviolet light therapy | Treatment of certain skin diseases with UV-B light                                                                                           |
| Vision                    | Ability to detect light patterns and interpret them into images                                                                              |
